1 **Same law, different results: comparative analysis of Endangered Species Act consultations by two**  
2 **federal agencies**

3 Megan Evansen<sup>a,b</sup>, Ya-Wei Li<sup>b,c</sup>, and Jacob Malcom<sup>b</sup>

4  
5 <sup>a</sup>Sustainable Development and Conservation Biology Graduate Program, 1213 H.J. Patterson Hall, College  
6 Park, MD 20740, USA

7 <sup>b</sup>Center for Conservation Innovation, Defenders of Wildlife, 1130 17<sup>th</sup> Street NW, Washington, DC 20036,  
8 USA

9 <sup>c</sup>Environmental Policy Innovation Center, 777 6<sup>th</sup> Street NW, 11<sup>th</sup> Floor, Washington, DC 20036, USA

10

11 Corresponding author: Megan Evansen<sup>2</sup>

12 Defenders of Wildlife

13 1130 17<sup>th</sup> Street NW

14 Washington, DC 20036

15 Phone: 1-202-772-0252

16 Email address: mevensen@defenders.org

## 17 **ABSTRACT**

18 Evaluating how wildlife conservation laws are implemented is critical for safeguarding biodiversity. Two  
19 agencies, the U.S. Fish and Wildlife Service and National Marine Fisheries Service (FWS and NMFS;  
20 Services collectively), are responsible for implementing the U.S. Endangered Species Act (ESA), which  
21 requires federal protection for threatened and endangered species. FWS and NMFS' comparable role for  
22 terrestrial and marine taxa, respectively, provides the opportunity to examine how implementation of the  
23 same law varies between agencies. We analyzed how the Services implement a core component of the ESA,  
24 section 7 consultations, by objectively assessing the contents of >120 consultations on sea turtle species  
25 against the requirements in the Services' consultation handbook, supplemented with in-person interviews of  
26 Service biologists. Our results showed that NMFS consultations were 1.40 times as likely to have higher  
27 quality scores than FWS consultations. Consultations tiered from an FWS programmatic consultation  
28 inherited the higher quality scores of the programmatic consultation, indicating that programmatic  
29 consultations could increase the efficiency of the section 7 process. Both agencies commonly neglected to  
30 account for the effects of previous consultations and the potential for compounded effects on species. From  
31 these results, we recommend actions that can improve quality of consultations, such as a single database to  
32 track and integrate previously authorized harm in new analyses and the careful but more widespread use of  
33 programmatic consultations. Our study reveals several critical shortfalls in the current process of conducting  
34 ESA section 7 consultations that the Services could address to better safeguard North America's most  
35 imperiled species.

## 36 1. INTRODUCTION

37 The U.S. Endangered Species Act (ESA) is considered one of the strongest wildlife laws in the world  
38 (Gosnell 2001). Signed into law in 1973 by President Richard Nixon in response to rising concern over the  
39 number of species threatened by extinction, the ESA protects over 1,650 U.S. species by prohibiting negative  
40 impacts on species and their habitats and guiding the recovery of populations (USFWS 2017). Today, the  
41 ESA remains the primary piece of environmental legislation for protecting imperiled species and recovering  
42 them to the point that the law's protections are no longer needed. With such a crucial role, the ESA must be  
43 implemented correctly. Yet agencies often struggle with gaps in effective implementation as they face  
44 funding shortfalls and staff limitations alongside a rising number of listed species. Although the ESA is a  
45 strong law, effective implementation in the face of these challenges is key, and opportunities for  
46 improvement in efficiency and effectiveness are crucial if the ESA is to continue successfully recovering and  
47 delisting species.

48 Section 7 of the ESA directs federal agencies to use their authorities to conserve listed species and is  
49 a key aspect of the law's strength. Under section 7(a)(2), federal agencies ("action agency") are instructed to  
50 consult with the U.S. Fish and Wildlife Service (FWS) or the National Marine Fisheries Service (NMFS) if  
51 any action authorized, funded, or carried out may jeopardize listed endangered or threatened species or  
52 destroy or adversely modify species' critical habitat (for definitions see Box 1, Glossary). If an action agency  
53 initially concludes that the action is not likely to adversely affect species or their critical habitat, the agency  
54 must request Service concurrence on its finding. If the Service concurs, the consultation is complete; This  
55 assessment is classified as an "informal consultation." Conversely, if an action is deemed likely to adversely  
56 affect species or critical habitat a "formal consultation" is initiated, and the consulted Service will issue a  
57 biological opinion with their findings of the project's impact on imperiled species. FWS and NMFS share  
58 administration of the ESA, with NMFS generally overseeing marine species and FWS managing terrestrial  
59 and freshwater species (USFWS and NOAA 1974). However, both Services have authority over some listed  
60 species that cross jurisdictional boundaries, such as sea turtles, and consult with action agencies on these  
61 joint-jurisdiction species. If done properly, consultations ensure that federal agency actions do not violate the  
62 jeopardy and adverse modification prohibitions of the ESA, thereby minimizing negative effects on listed  
63 species.

64 The consultation process is guided by the Section 7 Handbook, which was created by the Services to  
65 "promote efficiency and nationwide consistency [of consultations] within and between the Services"  
66 (USFWS and NMFS 1998). The Handbook guides biologists to ensure consultations are serving their  
67 purpose of adequately protecting listed species and lays out a framework for what should be included in each  
68 section of a biological opinion issued by the Service. However, the Handbook is a guidance document only  
69 and does not prescribe all details of a consultation. This results in variation in consultation quality, which  
70 could become problematic if differences introduce inefficiencies or inconsistencies that ultimately reduce the  
71 protection or conservation of imperiled species.

72 Two preliminary observations suggest consultation quality may differ between the Services in ways that  
73 reduce consultation effectiveness. First, recent analysis of data on all section 7 consultations recorded by  
74 FWS from 2008-2015 (Malcom and Li 2015) revealed discrepancies in the time duration of consultations  
75 between the Services. Whereas the FWS completed 80% of formal consultations within the 135-day time  
76 limit set by the Handbook (the proportion of on-time consultations is likely higher because the data do not  
77 include information on legitimate "pauses" during consultation; JWM and Y-WL, pers. obs.), NMFS  
78 completed only 30% (NMFS 2014). This discrepancy in timing could indicate a problem in the  
79 conservation process if, for instance, FWS is compromising quality for quantity in order to complete its  
80 required number of consultations, which is substantially greater than NMFS despite receiving similar levels  
81 of funding (USFWS 2017; NOAA 2017). Second, based on the authors' combined experience of reading  
82 hundreds of consultation documents, we observed high variation in the general quality and consistency of  
83 consultation documents (authors, pers. obs.). Variation appears to be structured (e.g., by species or office)  
84 rather than random, and especially large differences occur between consultations produced by the two  
85 Services. There are numerous reasons why the FWS and NMFS could differ in their approach to or process  
86 for consultations. For example, the two agencies have different organizational histories and cultures and

87 receive different levels of funding, all of which can vary by region and office even within each Service (see,  
88 e.g., Lowell and Kelly 2016). Understanding the type and degree of variation between consultations could  
89 help identify the cause and outcome of differences and assist in designing solutions that minimize  
90 inconsistencies and maximize quality to support the Services in enforcing the ESA. Yet to our knowledge,  
91 there has never been a systematic analysis of differences in consultation quality, creating a knowledge gap  
92 with direct implications for biodiversity conservation and environmental policy.

93 We addressed this need by quantitatively evaluating variation in how the Services implement section 7  
94 for threatened and endangered species of sea turtles. Sea turtles are one of the few taxa which falls under  
95 the jurisdiction of both the FWS and NMFS, offering a unique opportunity for direct comparison of  
96 consultation quality.

97 Our study examined the quality of ESA consultations through developing a novel, objective scoring  
98 system based on the requirements of the Section 7 Handbook. We expect consultations that follow the  
99 requirements of the Handbook are more likely to result in better conservation outcomes because the  
100 Handbook provides the best available description of protections to comply with section 7. Here, we tested  
101 the hypothesis that the quality of section 7 consultations, as measured against their joint handbook, is equal  
102 between the Services. To do this, we take advantage of a natural experiment to analyze the differences in  
103 how the Services implement the consultation process. While the null hypothesis may be equality, based on  
104 previous observations, we expect NMFS consultations to be of higher quality than FWS consultations. We  
105 report significant differences in the quality of both the formal and informal consultations between the  
106 Services. Study results highlight several pathways by which the Services can systematically improve the  
107 quality of consultations to strengthen the ESA and ensure the protection and recovery of North America's  
108 most imperiled species.

## 109 2. METHODS

### 110 2.1 Sampling

111 The Services have carried out hundreds of thousands of consultations since the ESA was established, thus  
112 we devised a sampling study design to make our assessment feasible. Because consultations are often  
113 context-specific and can differ depending on predictable categorizes such as action type and species,  
114 random sampling of species was not suitable for our objective. Following prior methods (Owen 2012), we  
115 chose a defined subset of consultations to make comparisons between the Services more direct and  
116 insightful. We controlled for extraneous sources of variation by conducting our analysis on consultations  
117 from January 2008 through April 2015 and involving actions proposed by the Army Corps of Engineers  
118 that could potentially impact sea turtles in Florida. This focus enabled us to minimize confounding factors  
119 that might be introduced by the time period, type of evaluated action, species natural history or geographic  
120 variation so as to focus on differences between the Services consultation process and output. Species of sea  
121 turtle were the most consulted on by the Army Corp of Engineers and included green sea turtle [*Chelonia*  
122 *mydas*], loggerhead sea turtle [*Caretta caretta*], Kemp's ridley sea turtle [*Lepidochelys kempii*], leatherback  
123 sea turtle [*Dermochelys coriacea*], and hawksbill sea turtle [*Eretmochelys imbricata*].  
124  
125

### 126 2.2 Consultation Selection

127 We obtained consultation data that met our sample criteria from several publicly-available databases. We  
128 accessed NMFS consultations using the Public Consultation Tracking System (PCTS;  
129 <https://pcts.nmfs.noaa.gov/pcts-web/homepage.pcts>), which allows users to directly download  
130 consultations. FWS has a similar database of consultation records, the Tracking And Integrated Logging  
131 System (TAILS). TAILS is designed to help coordinate record-keeping between field and regional offices  
132 of FWS and does not provide the consultation documents. Instead, the TAILS database provides records of  
133 FWS consultations but has no public interface, therefore we accessed TAILS records using the Section 7  
134 Explorer web application ([https://cci-dev.org/shiny/open/section7\\_explorer](https://cci-dev.org/shiny/open/section7_explorer); Malcom and Li 2015) that  
135 allows the public to search for consultations using TAILS data. Using PCTS and the Section 7 Explorer, we  
136 randomly selected 30 formal and 30 informal consultation records from each Service during the study time

137 period. We acquired the NMFS consultations directly from PCTS, while those from FWS we acquired  
138 through FWS South Florida Field Office's online document library for biological opinions  
139 ([https://www.fws.gov/verobeach/verobeach\\_old-dontdelete/sBiologicalOpinion/index.cfm](https://www.fws.gov/verobeach/verobeach_old-dontdelete/sBiologicalOpinion/index.cfm)) or through a  
140 Freedom of Information Act (FOIA) request. While evaluating the original selection of NMFS formal  
141 consultations, we discovered some that did not assess sea turtles in the biological opinion despite search  
142 parameters constrained to sea turtles. To account for this discrepancy, we removed those not assessing sea  
143 turtles and randomly selected an additional 10 formal NMFS consultations for evaluation from the PCTS  
144 database. All of the consultations analyzed in this work are archived at Open Science Framework (OSF)  
145 under <https://dx.doi.org/10.17605/OSF.IO/KAJUQ>.

146

### 147 **2.3 Evaluation Criteria**

148 For each consultation we recorded the start and end dates of the consultation, year completed, regional office  
149 filed through, species of sea turtles, page length, and other general information. All evaluated consultations  
150 and data are provided at OSF (<https://dx.doi.org/10.17605/OSF.IO/KAJUQ>). We developed different scoring  
151 methodologies for formal and informal consultations because each type involved different content. Scoring  
152 rubrics are provided in SI Appendix 1 (formal consultations) and Appendix 2 (informal consultations). It was  
153 not feasible to blind scorers to the Service that wrote consultations because of the nature of the documents;  
154 any familiarity with the consultation process makes the Service immediately apparent. Therefore, reviewers  
155 were not blind to the Service when analyzing quality. When there was any ambiguity as to the appropriate  
156 score, a second reviewer (JWM) would read the consultation in question, then decide on the appropriate  
157 score with the primary reviewer (ME).

158 For formal consultations, we selected the four core sections from the Handbook to score the quality of  
159 each biological opinion: "Status of the Species," "Environmental Baseline," "Effects of the Action," and  
160 "Cumulative Effects." Although not an exhaustive list of biological opinion sections, these four sections  
161 contain the bulk of the information and analysis of the species and proposed action. The Status of the Species  
162 and Environmental Baseline sections received a score from 0-5 and the Effects of the Action and Cumulative  
163 Effects sections were given a score from 0-2 based on how well they met the specific requirements for that  
164 section by the Handbook. Rating the quality of these core sections of the biological opinion was  
165 straightforward because the criteria described by the Handbook allowed for a simple present/absent scoring  
166 system. These present/absent scores were summed for each of the four core sections, resulting in a maximum  
167 possible score of 5 or 2 points. We calculated total quality by summing the scores across all four sections.  
168 The overall quality was normalized by calculating the ratio of the summed score to the total points possible  
169 for each consultation.

170 Scoring the informal consultations used a simpler rubric because informal consultations are shorter,  
171 rarely have individual sections, and the Services generally do not prescribe the required contents. We  
172 surveyed a selection of informal consultation documents from both Services and considered what  
173 information Services personnel need in order to evaluate the effects of actions and monitor the action after  
174 consultation is complete. We identified five criteria to evaluate the quality of informal consultations: stating  
175 the action, analysis of the action, analysis of the impacted species, stating the reason why the consultation  
176 stayed informal and including a map of the area affected by the action. Though a map is not required by the  
177 Handbook, the action area is highly important for much of the consultation analysis, and thus the inclusion  
178 or omission of a map was scored. These criteria were each assigned 1 point, for a total possible score of 5  
179 points.

180 During the preliminary work we noticed the use of "sticker concurrences," in which the FWS South  
181 Florida Office recorded only a sticker of consent applied to the request for concurrence provided to FWS  
182 (SI Figure 1). This sticker of approval for the action worked in lieu of a complete informal consultation, and  
183 no additional consultation documentation was supplied. Despite their lack of analysis, sticker concurrences  
184 were scored in the same manner as all other informal consultations.

185

### 186 **2.4 Statistical Analyses**

187 Our goal was to understand patterns and associations of variation in consultation quality. We used summary

188 statistics (mean and standard deviation) and Pearson's correlations to describe patterns. To examine  
189 relationships between quality and associated factors, we used two modeling approaches: (1) a binomial  
190 generalized linear model (GLM; McCullagh and Nelder 1989) to examine the proportions of total possible  
191 points, and (2) ordinal logistic regression (OLR; Kleinbaum and Klein 2010) to analyze the individual  
192 quality component scores. We considered six variables that were most likely to affect consultation quality:  
193 The Service performing the consultation, whether the consultation was formal or informal, the year the  
194 consultation took place, the species of sea turtle assessed, the type of action assessed, and whether the  
195 consultation was part of a programmatic consultation (see Glossary). We incorporated these variables into a  
196 global model (Model 1) of all variables and eight additional subset candidate models for the analysis of  
197 overall quality using the GLM (Table 1). We also considered that the particular office within the Service  
198 might be an important predictor of consultation quality. However, given that our focus is on the potential  
199 differences between the Services and that the offices are nested within the Services, the office variable was  
200 not included in our candidate model set. Because of the fundamental differences between formal and  
201 informal consultations and the difference in total possible score, we calculated the response variable as the  
202 proportion of possible points for each consultation. When we analyzed data separately for formal and  
203 informal consultations, we used reduced candidate model sets by removing the informal consultation  
204 variable from formal analyses and the formal and programmatic variables from the informal analyses.

205 We used a set of three candidate ordinal regression models (Table 1) with random effects for the  
206 consultation document in which the components were nested. While programmatic consultation was an  
207 important predictor of quality in the overall analysis, the Hessian was singular (presumably because of the  
208 lack of NMFS programmatic consultations) for the components and we were not able to include  
209 programmatic as a variable in these analyses. We therefore evaluated summary statistics to investigate the  
210 role of programmatic consultations in shifting quality scores. We used the R package `ordinal` (Christensen  
211 2015) to conduct ordinal regression. A univariate analysis was performed to identify predictor variables.

212 We carried out model selection (Anderson and Burnham 2002) based on Akaike's Information  
213 Criterion adjusted for small sample sizes ( $AIC_c$ ) using the  $AICcmodavg$  package (Mazerolle 2011). We  
214 considered models with  $\Delta AIC_c < 2.0$  as having strong support (Anderson and Burnham 2002). All analyses  
215 were done in R 3.3 (R Core Team 2016) and are available as a package vignette in the project's OSF  
216 repository (<https://dx.doi.org/10.17605/OSF.IO/KAJUQ>).

217

## 218 **2.5 Biologist Interviews**

219 To better understand the consultation process, one of the authors (ME) conducted semi-structured  
220 interviews (see, e.g., Pienaar 2015) with one biologist from NMFS and six biologists from FWS who  
221 consulted on sea turtles in Florida. All biologists interviewed were on the list of Service personnel who  
222 worked directly on the consultations evaluated for this study. Interviews were not meant to be  
223 representative of a larger sample but were instead intended to provide further insight into results.  
224 Interviews were conducted concurrent with our scoring of the consultations (in August 2015), and the  
225 interview questions were based on our understanding of the Handbook and preliminary examination of the  
226 consultations we reviewed. Following a set of questions, we asked interviewees about their opinions on the  
227 consultation process and how well consultations serve the intended purpose (SI Appendix 3). We then  
228 coded answers into categories of similar themes. We interviewed all biologists under the condition of  
229 anonymity. Although the sample size is too small for statistical analysis, we reviewed and scored the notes  
230 from the interviews to summarize recurring themes.

231

## 232 **3. RESULTS**

233 We retrieved, read, and scored 55 consultations produced by FWS (30 formal and 25 informal) and 68  
234 consultations produced by NMFS (38 formal and 30 informal) for a total of 123 consultations.  
235 Consultations assessed the effects of the action on seven species on average (Table 2). Formal consultations  
236 ranged in length from 1 to 120 pages and required over a year to complete on average. Of the core quality  
237 sections evaluated, 'Status of the Species' was by far the longest, with an average of 19 pages. This section

often contained lengthy content that was neither relevant to the species' life history in the geographic area of the action nor to the effects of the action. In our random sample of FWS informal consultations, only one featured the sticker concurrence that we observed in the preliminary work.

### 3.1 Overall Consultation Quality

Generalized linear modeling suggested that consultation quality was best explained by Model 9, which showed the lowest AIC<sub>c</sub> ( $\Delta\text{AIC}_c = \sim 2$ ; Table 3). This model, which included all predictors except action type and year, indicated that a consultation done by NMFS was 1.40 times (95% CI = 1.25 - 1.57; Figure 1a) as likely to receive a higher score for quality components as a consultation done by FWS. FWS's programmatic consultations provided a significant quality boost (OR = 1.35; 95% CI = 1.17 - 1.56), but formal consultations were about as likely (OR = 1.0; 95% CI = 0.89 - 1.13; Figure 1b) to score higher as informal consultations (Table 4). The duration of consultations was positively associated with overall quality in a univariate GLM ( $r = 0.20$ ;  $p = 1.04e^{-6}$ ) but did not rank as an important variable in the multivariate analysis. Similarly, the page length was also correlated with quality in a univariate analysis ( $r = 0.2$ ,  $p = 0.0037$ ). However, after accounting for the Service performing the consultation and for programmatic consultations in a binomial GLM, there was no relationship ( $z = 1.024$ ,  $p = 0.306$ ). Model 2, which included the same predictors as Model 9 but added in the year the consultation was completed, was also supported. This model indicated that the year was associated with a slight decrease in consultation quality over the study period, though this association was not statistically significant (OR = 0.993; 95% CI = 0.97 - 1.02), thus we focus on model 9.

### 3.2 Quality Components

We examined sources of variation in the components of overall consultation quality. The only component of formal consultations that exhibited a strong association with any predictor variables was the Environmental Baseline, for which Service was a strong predictor of quality and NMFS was more likely to produce higher quality consultations ( $z = 5.3993$ ,  $p = 6.691e^{-8}$ ;  $\text{OR}_{\text{NMFS}} = 2.6e^4$  [95% CI =  $6.5e^2 - 1.1e^6$ ]; Figure 2). For the Environmental Baseline section, NMFS consultations were constructively more comprehensive, and tended to include previous consultations in the action area and discuss critical habitat or lack thereof as per the Handbook, neither of which were consistently present in FWS consultations. Most of the quality components of informal consultations were similar except for two categories (Figure 3). The analysis of the action and the reason the consultation was informal were associated with the time duration of the consultation (at a nominal  $\alpha = 0.05$ ): generally, the longer the informal consultation took to complete, the more likely these components were included. Second, although not required by the Consultation Handbook, half of NMFS but only 15% of FWS informal consultations included a map of the proposed action.

### 3.3 Interviews

We interviewed six biologists from FWS and one from NMFS and coded their responses into categories of similar themes (Table 5; full response notes in SI Appendix 4). When asked how the consultation process could be improved, most biologists (6/7) mentioned they found the process frustrating and many stated that they were overwhelmed with work. One biologist pointed to the fear of possible litigation resulting from shorter consultations as a reason for the overly comprehensive and highly time-consuming consultations that are currently the norm. Five of seven biologists also favored expanding the use of consultation keys, which are designed to help the biologists improve the timing and consistency of consultations when appropriate for a species or on a case-by-case basis (see, e.g., <http://www.fws.gov/panamacity/resources/WoodStorkConsultationKey.pdf>; SI Appendix 5). All biologists interviewed except one mentioned that they keep a record of cumulative incidental take, which varied in form from notes kept on a whiteboard to Excel spreadsheets. However, only three consultations (all from NMFS) incorporated previously authorized take in the analysis of the effects of the current action on sea turtle populations.

288

## 289 **4. DISCUSSION**

290 The ESA is considered one of the strongest national wildlife protection laws in the world (Schwartz 2008),  
291 and section 7 is a foundation of this strength. The content and quality of section 7 consultations can alter  
292 conservation outcomes, but such protections can only be realized if the scientific and regulatory analyses  
293 are robust. Despite the importance of consistently high-quality consultations, no analyses have critically  
294 evaluated the strengths and weaknesses of these regulatory documents. Our analysis offers an urgently-  
295 needed first step towards assessing the quality of consultations to inform and improve future consultations.  
296 Across all 123 consultations evaluated, we found that quality varied significantly between the Services and  
297 that the quality of NMFS consultations was higher than FWS consultations. In combination with the  
298 biologist interviews, which illuminate some of the possible causes of variation, our results reveal specific  
299 areas of improvement to ensure that future consultations achieve their objective of protecting threatened and  
300 endangered species.

301

### 302 **4.1 Consultation Quality**

303 The quality of both formal and informal consultations was higher in documents produced by NMFS than  
304 FWS. This result is consistent with prior findings that NMFS scored higher than FWS in three of seven  
305 metrics characterizing the use of “Best Available Science” in recovery plans, lawsuits, listing decisions, and  
306 literature cited in biological opinions and no difference was detected between the agencies in the other four  
307 metrics (Lowell and Kelly 2016). Although the cause of the difference is beyond the scope of our study, our  
308 interviews with Service biologists suggested one possible explanation: that the lack of time and resources  
309 available for the agencies’ ever-increasing consultation workload may limit their quality. The FWS  
310 biologists we interviewed especially stressed this point, which reflects the funding shortfall experienced by  
311 the FWS endangered species program. This program receives approximately equal funding as the Office of  
312 Protected Resources at NMFS even though Ecological Services within FWS is responsible for 15 times as  
313 many ESA-listed species (Lowell and Kelly 2016). Expenditures per consultation is therefore likely much  
314 lower for FWS. Future research should investigate how the Services allocate funding to consultations  
315 compared to other endangered species program components, such as listing and recovery.

316 Our scoring of the individual sections of biological opinions provides further insight into why FWS  
317 consultations are lower quality than NMFS consultations and for which content both Services deviate from  
318 the expectations of the Handbook. Although documents by both Services consistently showed low quality  
319 in the Environmental Baseline section because previously authorized incidental take in the action area was  
320 rarely analyzed, FWS scored lower than NMFS because the take analysis was missing from all prior  
321 consultations. The lack of this analysis is one of the most pernicious problems with implementing the ESA  
322 (Owen 2012). The omission of hundreds or thousands of minor take actions from analysis in consultations  
323 can compound to result in “death by a thousand cuts,” whereby individual actions are insignificant for the  
324 species but the cumulative effects across many actions severely damage their populations (USFWS 2012).  
325 A 2009 Government Accountability Office report on FWS’s implementation of the ESA highlighted this  
326 concern and recommended that the Services track authorized take across a species’ entire range to better  
327 inform consultations (GAO 2009). The only three consultations that included an analysis of previously  
328 authorized take were all produced by NMFS, enhancing the quality difference between the Services for this  
329 core section. However, it is worth noting that FWS’s programmatic consultation for beach work across  
330 Florida listed previous formal consultations (Activity Code 41910-2010-F-284), yet those data were not  
331 analyzed in the evaluated consultation and there was no evidence they played a role in the Environmental  
332 Baseline or the Effects Analysis. It is unclear why previously authorized take in the action area was not  
333 analyzed, especially since many biologists that we interviewed stated that they record cumulative take.  
334 Future research should investigate the disconnect between the information that Services biologists record  
335 and the information included in consultations.

336 Although the Handbook requires certain analyses for each section, sections of many FWS consultations  
337 contained little or no analysis and instead merely repeated the boilerplate language from the Handbook.



338 This was particularly true of the Cumulative Effects section of FWS consultations, which often mentioned  
339 the obligation to “include the effects of future State, tribal, local or private actions that are reasonably  
340 certain to occur,” followed by a statement that there would be no cumulative effects. In contrast, most  
341 NMFS consultations more thoroughly analyzed the cumulative effects, which are critical to understanding  
342 the effects on species recovery.

343 The Handbook guidance for informal consultations is less prescriptive than for formal consultations, but  
344 our analysis revealed that the quality of consultations by FWS is similarly lower than for NMFS. Three  
345 components — the analysis of the action, the species analysis, and a map of the action area — were  
346 consistently missing or insufficient in the informal FWS consultations that we reviewed. On one hand,  
347 because informal consultation is merely a prerequisite to determine whether formal consultation is  
348 warranted, we recognize that detailed informal consultation analysis is unlikely to benefit ESA-listed  
349 species. Nonetheless, omission of content means that the administrative record is inconsistent, incomplete  
350 and, most alarming of all, differs from the Services’ expert recommendations for informal consultations.  
351 We see this in the use of “sticker” concurrences, observed both in our preliminary work and in one  
352 randomly sampled informal consultation. While these stickers may save time, they provide no record of  
353 why FWS approved the action or method for assessing whether FWS properly implemented that component  
354 of the ESA. Furthermore, in contrast, all informal consultations from NMFS explained why the consultation  
355 was informal. The shortcomings of FWS informal consultations can likely be explained by the resource  
356 constraints, yet we highlight this example as an invitation for the agency to critically evaluate whether such  
357 shortcuts appropriately achieve greater efficiency, or whether different improvements could make the  
358 process more effective.

359

#### 360 **4.2 Opportunities for Improving Consultation Efficiency**

361 The stark difference between the FWS and NMFS in consultation quality, highlight gap in the way section  
362 7 is implemented. This discrepancy, coupled with the known disparity in both workload and resources (both  
363 financial and personnel) available per consultation, means that improving the efficiency with which the  
364 Services carry out consultations is essential to properly implementing the ESA. Ideally, the Services should  
365 spend enough time on each consultation so as to maximize the conservation benefit to a listed species.  
366 Awareness of this optimal threshold, and the required content to reach it, would avoid overspending  
367 precious resources (Converse and colleagues 2011). Here we discuss some critical inefficiencies, and  
368 potential pitfalls of efficient approaches, indicated by our results.

369 The higher quality scores associated with consultations tiered off of the FWS programmatic consultation  
370 indicate that programmatic consultations are one promising way to improve consultation efficiency in  
371 concept. The effects analysis of programmatic consultations should provide a better description of  
372 cumulative effects because many planned or potential projects within a program are evaluated together  
373 rather than individually. We expect that when the cumulative impacts are properly acknowledged, the  
374 assessment of jeopardy or adverse modification is more likely to reflect real-world conditions. Another  
375 benefit is that because the overall program has already been evaluated, the consultations for future  
376 individual projects are faster and can contain less analysis. Malcom and Li (2015) found that project-level  
377 consultations that tiered off of a program-level consultation were completed nearly three times faster than  
378 the average standard consultation. In the set of consultations we evaluated, the single FWS program-level  
379 programmatic consultation for beach renourishment across Florida was a “tide that raised all boats,” in  
380 which the project-level programmatic consultations that tiered off of the program-level programmatic  
381 consultation “inherited” the (generally) high scores of the program-level consultation and significantly  
382 increased the quality of FWS consultations. Whether this is an outlier or representative of programmatic  
383 consultations in general is unclear but deserves further investigation. But the converse is also possible: low-  
384 quality program-level programmatic consultations would mean that tiered consultations inherit low-quality  
385 analyses that would likely lead to poor conservation outcomes. While the results from this set of  
386 consultations are promising, the Services need to continually evaluate their programmatic consultations to  
387 ensure that the speed benefits of these consultations do not overshadow the need for high-quality analyses.

388 Our interviews with biologists from the Services provided important context for interpreting the results  
389 and indicated other possibilities for improving consultation efficiency. The lack of consistency among  
390 offices and between Services was frequently mentioned as a frustrating aspect of the consultation process  
391 during the interviews. The differing approaches to consultations can be difficult for action agencies as well,  
392 who can see the approval of a project depend largely on the consulting office (Y-WL and JWM, pers. obs.).  
393 One possible solution that we did not test is the use of consultation keys, as have been developed for Army  
394 Corps of Engineers consultations for a few species, including wood storks (*Mycteria americana*) and indigo  
395 snakes (*Drymarchon couperi*). The Services use these documents to promote appropriate standards for  
396 certain construction activities. Creating similar documents for other frequently-consulted species may  
397 streamline consultations and increase inter-office and inter-Service consistency. The use of consultation  
398 keys would also increase the transparency of the consultation process, making it easier for action agencies  
399 or their applicants to plan their projects.

400 Last, we note one particular aspect of consultations that was not amenable to quantitative analysis but  
401 suggests efficiency improvements: inclusion of extensive material seemingly irrelevant to evaluating the  
402 effects of the action. For example, several consultations we reviewed included >20 pages of information on  
403 red knots (*Calidris canutus*), of which one paragraph was relevant to evaluating the action (JWM, pers.  
404 obs.). Including such inconsequential background information requires additional time not only for  
405 Services' biologists, but also for the action agency or their applicants who read the opinion. By way of  
406 explanation, one FWS biologist mentioned that such information was included to buffer against any  
407 potential legal action, ensuring all "bases are covered." However, this approach conflates "more" with  
408 "better" — the added time and cost does not always produce commensurate benefits for legal defensibility  
409 or conservation (Restani and Marzluff 2002). We encourage the Services to critically evaluate the  
410 information in biological opinions and exclude irrelevant material. The Recovery Planning Initiative (RPI)  
411 being developed by FWS at this time (SI Appendix 6) can help with this extraneous information problem.  
412 One component of RPI is a single, continually updated Species Status Assessment (SSA) for each ESA-  
413 listed species, which would be incorporated by reference in consultations, conservation permits, five-year  
414 reviews, and other aspects of ESA implementation (SI Appendix 7). Widespread adoption of SSAs would  
415 improve efficiency and, because they should include an analysis of previously authorized take, improve the  
416 effectiveness of section 7 consultations.

417

### 418 **4.3 Policy Recommendations**

419 Our results provide a basis for several policy recommendations that would improve the Services  
420 implementation of section 7 of the ESA:

- 421 1. *Develop and require the use of a single database for recording and querying authorized take.* The  
422 component most commonly missing from consultations we reviewed was an analysis of previously  
423 authorized take in the action area. This is not surprising because FWS and NMFS have not yet  
424 established a unified, systematic way for their biologists to record authorized take, much less to  
425 comprehensively quantify and track previously authorized take to use in the jeopardy and adverse  
426 modification analyses. A centralized take database was recommended by the GAO seven years ago  
427 (GAO 2009) but has not yet been implemented by the Services. Implementing this recommendation  
428 would dramatically improve the quality of the Environmental Baseline analysis of consultations. In  
429 turn, we expect better conservation outcomes for consulted-on species. Beyond consultations, an  
430 authorized take database would be invaluable for informing ESA-required five-year status reviews,  
431 such that harmful effects from consultations can be compared to beneficial effects from conservation  
432 activities.
- 433 2. *Establish a systematic review protocol to ensure that programmatic consultations, which can*  
434 *increase efficiency, do not reduce the effectiveness of consultation.* Programmatic consultations can  
435 increase consultation effectiveness and efficiency – in theory – but the Services must ensure that the  
436 quality of project-level consultations is not sacrificed. In our results, the programmatic consultation  
437 was the "rising tide that lifted all boats." Ensuring that other and future programmatic consultations

438 are similarly well-crafted can result in high quality, consistently- implemented consultations. The  
439 Services have expressed an interest in increasing the use of programmatic consultations, but such an  
440 increase must formally guard against a loss of effectiveness. Regular reviews at the field office,  
441 regional, and national levels, guided by a robust “checklist” of effectiveness measures, could also  
442 benefit an expansion of the use of programmatic consultations.

- 443 3. *Require more widespread development and use of consultation keys.* Our results revealed variation  
444 in consultation quality between the Services. If we had chosen a wider selection of consultations,  
445 this variation may have further increased. This highlights the need to promote standardization as a  
446 means of improving the efficiency and effectiveness of consultations. The biologists we interviewed  
447 suggested that the use of consultation keys could improve consistency. Although not every species  
448 and every type of action is amenable to consultation keys, wider use of keys could significantly  
449 improve the parts of consultations where they are relevant.
- 450 4. *Reduce workload by referencing prior documents.* To reduce the rote workload for consultation  
451 biologists and consulting agencies, the Services could consider transitioning to referencing Species  
452 Status Assessments (SSAs), created as part of the Recovery Planning and Implementation strategy,  
453 in consultations. This would dovetail with FWS’s current revision of the recovery planning  
454 program, which places SSAs as a central piece of the process. Improving efficiency through  
455 standardization should not mean cutting corners, however. The informal concurrence stickers are a  
456 form of standardization but, as currently used, do not provide an adequate record of why decisions  
457 were made. They may be sufficient if modified slightly, such as by adding simple check boxes and  
458 short note fields to indicate the reason a consultation qualified as informal.

459 Implementing the above recommendations could significantly increase efficiency to better utilize the  
460 precious resources of the Services, and thus would improve the conservation benefit conferred by section 7  
461 consultations. Strengthening the quality of the consultations through these methods would enable the  
462 Services to improve the overall effectiveness of the ESA, thereby reinforcing its critical role in conserving  
463 imperiled species.

#### 464 **ACKNOWLEDGMENTS**

465 We thank the personnel from the Florida offices of the U.S. Fish and Wildlife Service; the St. Petersburg  
466 office of the National Marine Fisheries Service; and the Florida Fish and Wildlife Conservation  
467 Commission for their work on consultations and for the insights they provided us during this project. This  
468 research did not receive any specific grant from funding agencies in the public, commercial, or not-for-  
469 profit sectors.

470  
471

472 **LITERATURE CITED**

- 473 Burnham KP, Anderson DR. 2002. Model selection and multimodel inference: a practical information-  
474 theoretic approach. Springer.
- 475 Christensen, R. H. B. 2015. ordinal - Regression Models for Ordinal Data. R package version 2015.6-28.  
476 <http://www.cran.r-project.org/package=ordinal/>.
- 477 Converse SJ, Shelley KJ, Morey S, Chan J, LaTier A, Scafidi C, Crouse DT, Runge MC. 2011. A Decision-  
478 Analytic Approach to the Optimal Allocation of Resources for Endangered Species Consultation.  
479 *Biological Conservation* 144 (1): 319–29. doi:10.1016/j.biocon.2010.09.009.
- 480 Government Accounting Office (GAO). 2009. Endangered Species Act: The U.S. Fish and Wildlife Service  
481 Has Incomplete Information about Effects on Listed Species from Section 7 Consultations.  
482 <http://www.gao.gov/assets/290/289991.pdf>.
- 483 Gosnell, H. 2001. Section 7 of the Endangered Species Act and the Art of Compromise: The Evolution of a  
484 Reasonable and Prudent Alternative for the Animas-La Plata Project. *Natural Resources Journal* 41: 561.
- 485 Kleinbaum DG, Klein M. 2010. Logistic regression: A self-learning text. New York: Springer.
- 486 Lowell N, Kelly RP. 2016. Evaluating Agency Use of ‘best Available Science’ under the United States  
487 Endangered Species Act. *Biological Conservation* 196 (April): 53–59. doi:10.1016/j.biocon.2016.02.003.
- 488 Malcom JW, Li Y-W. 2015. Data Contradict Common Perceptions about a Controversial Provision of the  
489 US Endangered Species Act. *Proceedings of the National Academy of Sciences* 112 (52): 15844–49.  
490 doi:10.1073/pnas.1516938112.
- 491 Mazerolle MJ. 2011. AICcmodavg: model selection and multimodel inference based on (Q) AIC (c). R  
492 package version 1.
- 493 McCullagh P, Nelder JA. 1989. Generalized linear models. Second edition. Chapman and Hall/CRC, Boca  
494 Raton, Florida, USA. 532pp.
- 495 National Marine Fisheries Service (NMFS). 2014. FY 2014 Budget Summary. National Marine Fisheries  
496 Service, Washington, D.C.  
497 [http://www.corporateservices.noaa.gov/nbo/fy14\\_bluebook/FINALnoaaBlueBook\\_2014\\_Web\\_Full.pdf](http://www.corporateservices.noaa.gov/nbo/fy14_bluebook/FINALnoaaBlueBook_2014_Web_Full.pdf).
- 498 National Marine Fisheries Service (NMFS). 2017. FY 2017 Budget Summary. National Marine Fisheries  
499 Service, Washington, D.C.  
500 [https://www.corporateservices.noaa.gov/nbo/fy17\\_bluebook/FY17\\_BB\\_Final\\_508.pdf](https://www.corporateservices.noaa.gov/nbo/fy17_bluebook/FY17_BB_Final_508.pdf).
- 501 Pienaar, E.F., Kreye, M.M. & Jacobs, C. Conflicts between Cattlemen and the Florida Panther: Insights and  
502 Policy Recommendations from Interviews with Florida Cattlemen. *Hum Ecol* (2015) 43: 577.  
503 doi:10.1007/s10745-015-9765-x.
- 504 Owen, D. 2012. Critical Habitat and the Challenge of Regulating Small Harms. *Florida Law Review* 64:  
505 141.
- 506 R Core Team. 2016. R: A Language and Environment for Statistical Computing. R Foundation for Statistical  
507 Computing. Vienna, Austria.
- 508 Restani M, Marzluff JM. 2002. Funding Extinction? Biological Needs and Political Realities in the  
509 Allocation of Resources to Endangered Species Recovery. *BioScience* 52 (2): 169–77.  
510 doi:10.1641/0006-3568(2002)052[0169:FEBNAP]2.0.CO;2.
- 511 Schwartz M. W. 2008. The performance of the Endangered Species Act. *Annual Review of Ecology,  
512 Evolution, and Systematics* 39: 279-299. Doi: 10.1146/annurev.ecolsys.39.110707.173538.
- 513 U.S. Fish and Wildlife Service (USFWS). 2012. Endangered and Threatened Wildlife and Plants;  
514 Designation of Revised Critical Habitat for the Northern Spotted Owl. *Federal Register* 77 (46).  
515 [https://www.fws.gov/oregonfwo/species/Data/NorthernSpottedOwl/Documents/NSO-  
516 FinalCH\\_Rule21Nov2012.pdf](https://www.fws.gov/oregonfwo/species/Data/NorthernSpottedOwl/Documents/NSO-FinalCH_Rule21Nov2012.pdf).
- 517 ———. 2017. Listed Species Summary (Boxscore). Environmental Conservation Online System. Accessed  
518 2017-06-24. <http://ecos.fws.gov/ecp0/reports/box-score-report>.
- 519 U.S. Fish and Wildlife Service (USFWS). 2017. Budget Justifications and Performance Information, Fiscal  
520 Year 2017. Washington, D.C. [https://www.fws.gov/budget/2016/FY2017\\_FWS\\_Greenbook.pdf](https://www.fws.gov/budget/2016/FY2017_FWS_Greenbook.pdf)
- 521 USFWS, National Marine Fisheries Service (NMFS). 1998. Endangered Species Consultation Handbook.

522 U.S. Fish & Wildlife Service and National Marine Fisheries Service.  
523 [http://www.blm.gov/or/esa/files/ESA\\_Section7\\_Consultation\\_Handbook\\_1998.pdf](http://www.blm.gov/or/esa/files/ESA_Section7_Consultation_Handbook_1998.pdf).  
524 ———. 1974. Memorandum of Understanding between the U.S. Fish and Wildlife Service (DOI) and the  
525 National Marine Fisheries Service (NOAA/DOC) Regarding Jurisdictional Responsibilities and Listing  
526 Procedures under the Endangered Species Act of 1973. <http://www.nmfs.noaa.gov/pr/laws/esa/mou>  
527 [usfws.pdf](http://www.nmfs.noaa.gov/pr/laws/esa/mou).  
528

529 **TABLES**

530  
531 **Table 1.** Candidate generalized linear and ordinal regression models for predicting overall consultation  
532 quality and conservation action specificity.  
533

| Model Type      | Model Num. | Predictors                                                            |
|-----------------|------------|-----------------------------------------------------------------------|
| GLM Binom*      | 1          | Service + Formal + Year + Action_type + Programmatic + total_duration |
|                 | 2          | Service + Formal + Year + Programmatic + total_duration               |
|                 | 3          | Service + Formal + Year + Action_type + total_duration                |
|                 | 4          | Service + Formal + Year + total_duration                              |
|                 | 5          | Service + Formal                                                      |
|                 | 6          | Service                                                               |
|                 | 7          | Formal                                                                |
|                 | 8          | total_duration                                                        |
|                 | 9          | Service + Formal + Programmatic + total_duration                      |
| Ord. regress.** | 1          | Service + Year + (1 consultation_ID)                                  |
|                 | 2          | Service + (1 consultation_ID)                                         |
|                 | 3          | Year + (1 consultation_ID)                                            |
|                 | 4          | Programmatic                                                          |

534 \* Binomial logistic generalized linear model

535 \*\* Ordinal logistical regression

536 \*\*\* The notation “(1|var)” indicates a random effects variable

537

**Table 2.** Summary statistics across all 123 formal and informal consultations.

538

| Consultation type | Variable                          | Mean  | Min | Max  | SD    | N*  |
|-------------------|-----------------------------------|-------|-----|------|-------|-----|
| Formal            | Length (pages)                    | 34.6  | 1   | 120  | 21.1  | 284 |
|                   | Duration (days)                   | 371.5 | 6   | 1691 | 320.2 | 340 |
|                   | No. of species (total)            | 7     | 4   | 18   | 3.6   | 324 |
|                   | No. of References                 | 164.3 | 1   | 434  | 121.4 | 330 |
|                   | Species Status length (pages)     | 18.7  | 0   | 67   | 12.5  | 325 |
|                   | Baseline length (pages)           | 6.7   | 0   | 23   | 4.7   | 318 |
|                   | Effects length (pages)            | 5.4   | 0   | 15.5 | 3.9   | 303 |
|                   | Cumulative Effects length (pages) | 0.7   | 0   | 1.5  | 0.3   | 298 |
|                   | CR**                              | 0.9   | 0   | 1    | 0.3   | 292 |
|                   | CM**                              | 0.5   | 0   | 1    | 0.5   | 272 |
| RPM**             | 0.8                               | 0     | 1   | 0.4  | 287   |     |
| Informal          | Duration (days)                   | 163   | 0   | 1227 | 223.3 | 260 |
|                   | No. of species                    | 7.0   | 1   | 49   | 6.0   | 265 |
|                   | Construction Conditions           | 0.7   | 0   | 1    | 0.4   | 264 |

539

540

541

542

543

\* Numbers are based on individual turtle species per consultation because the jeopardy and adverse modification conclusion is made on per-species basis for an action. \*\* CR = Conservation Recommendations made by the Services; CM = Conservation Measures proposed by the action agency; RPM = Reasonable and Prudent Measures to minimize the amount of take resulting from an action

544 **Table 3.** Generalized linear model selection results for overall quality across 123 FWS and NMFS  
 545 consultations.

546

| Model | K* | AICc   | $\Delta AICc^{**}$ | Model Likelihood | Akaike Weight | Log Likelihood | Cum. Wt. |
|-------|----|--------|--------------------|------------------|---------------|----------------|----------|
| Mod9  | 5  | 1544.5 | 0.00               | 1.00             | 0.71          | -767.18        | 0.71     |
| Mod2  | 6  | 1546.3 | 1.79               | 0.41             | 0.29          | -767.05        | 1.00     |
| Mod1  | 14 | 1558.8 | 14.33              | 0.00             | 0.00          | -765.03        | 1.00     |
| Mod4  | 5  | 1561.4 | 16.90              | 0.00             | 0.00          | -775.63        | 1.00     |
| Mod3  | 13 | 1571.0 | 26.51              | 0.00             | 0.00          | -772.17        | 1.00     |
| Mod8  | 2  | 1574.5 | 30.08              | 0.00             | 0.00          | -785.26        | 1.00     |
| Mod5  | 4  | 1601.7 | 57.28              | 0.00             | 0.00          | -796.84        | 1.00     |
| Mod6  | 2  | 1607.4 | 62.94              | 0.00             | 0.00          | -801.69        | 1.00     |
| Mod7  | 2  | 1628.1 | 83.65              | 0.00             | 0.00          | -812.05        | 1.00     |

557 \* Indicates the number of variables in the model

558 \*\* The Akaike Information Criterion for model selection for small sample sizes. All models with an  
 559  $\Delta AICc < 2.0$  are considered to be supported.



560 **Table 4.** Odds ratios (OR), confidence intervals, and parameter statistics for model 9, the best-supported  
561 candidate set for predicting overall consultation quality.

562

|                    | OR                   | LCL (2.5%)*          | UCL (97.5%)**        | Model z-value | p-value              |
|--------------------|----------------------|----------------------|----------------------|---------------|----------------------|
| (Intercept)        | 5.54E <sup>-01</sup> | 4.93E <sup>-01</sup> | 6.23E <sup>-01</sup> | -9.883        | 4.94E <sup>-23</sup> |
| Service (NMFS)     | 1.40                 | 1.25                 | 1.57                 | 5.689         | 1.28E <sup>-08</sup> |
| Formal (yes)       | 1.00                 | 0.89                 | 1.13                 | 0.042         | 9.66E <sup>-01</sup> |
| Programmatic (yes) | 1.36                 | 1.18                 | 1.57                 | 4.202         | 2.64E <sup>-05</sup> |
| total duration     | 1.00                 | 1.00                 | 1.00                 | 1.454         | 1.46E <sup>-01</sup> |

563 \* LCL = Lower control limit

564 \*\* UCL = Upper control limit

565 **Table 5.** Responses to a selected sample of interview questions asked of FWS/NMFS biologists.  
566

| Biologist | Favor consultation keys | Often encounter scientific uncertainty | Tally cumulative take | Frequently reference section 7 Handbook | Favor publicly available consultations | Suggestions for improvement         |
|-----------|-------------------------|----------------------------------------|-----------------------|-----------------------------------------|----------------------------------------|-------------------------------------|
| 1         | In some cases           | No                                     | Yes                   | Yes                                     | Yes                                    | Inter-office consistency            |
| 2         | Yes                     | No                                     | Yes                   | No                                      | Yes                                    | None                                |
| 3         | No                      | No                                     | Yes                   | Variable                                | Yes                                    | Inter-office consistency            |
| 4         | Yes                     | Rarely, assume species is present      | Yes                   | No                                      | Yes                                    | Intra- and inter-office consistency |
| 5         | In some cases           | Rarely, assume species is present      | Makes an attempt      | Yes                                     | Yes                                    | BiOp streamlining                   |
| 6         | In some cases           | No                                     | Yes                   | Yes                                     | Yes                                    | Inter-office consistency            |
| 7         | No, too nuanced         | Yes, defer to species                  | No - too difficult    | No                                      | Yes                                    | Improve efficiency                  |

567

568 **FIGURES**

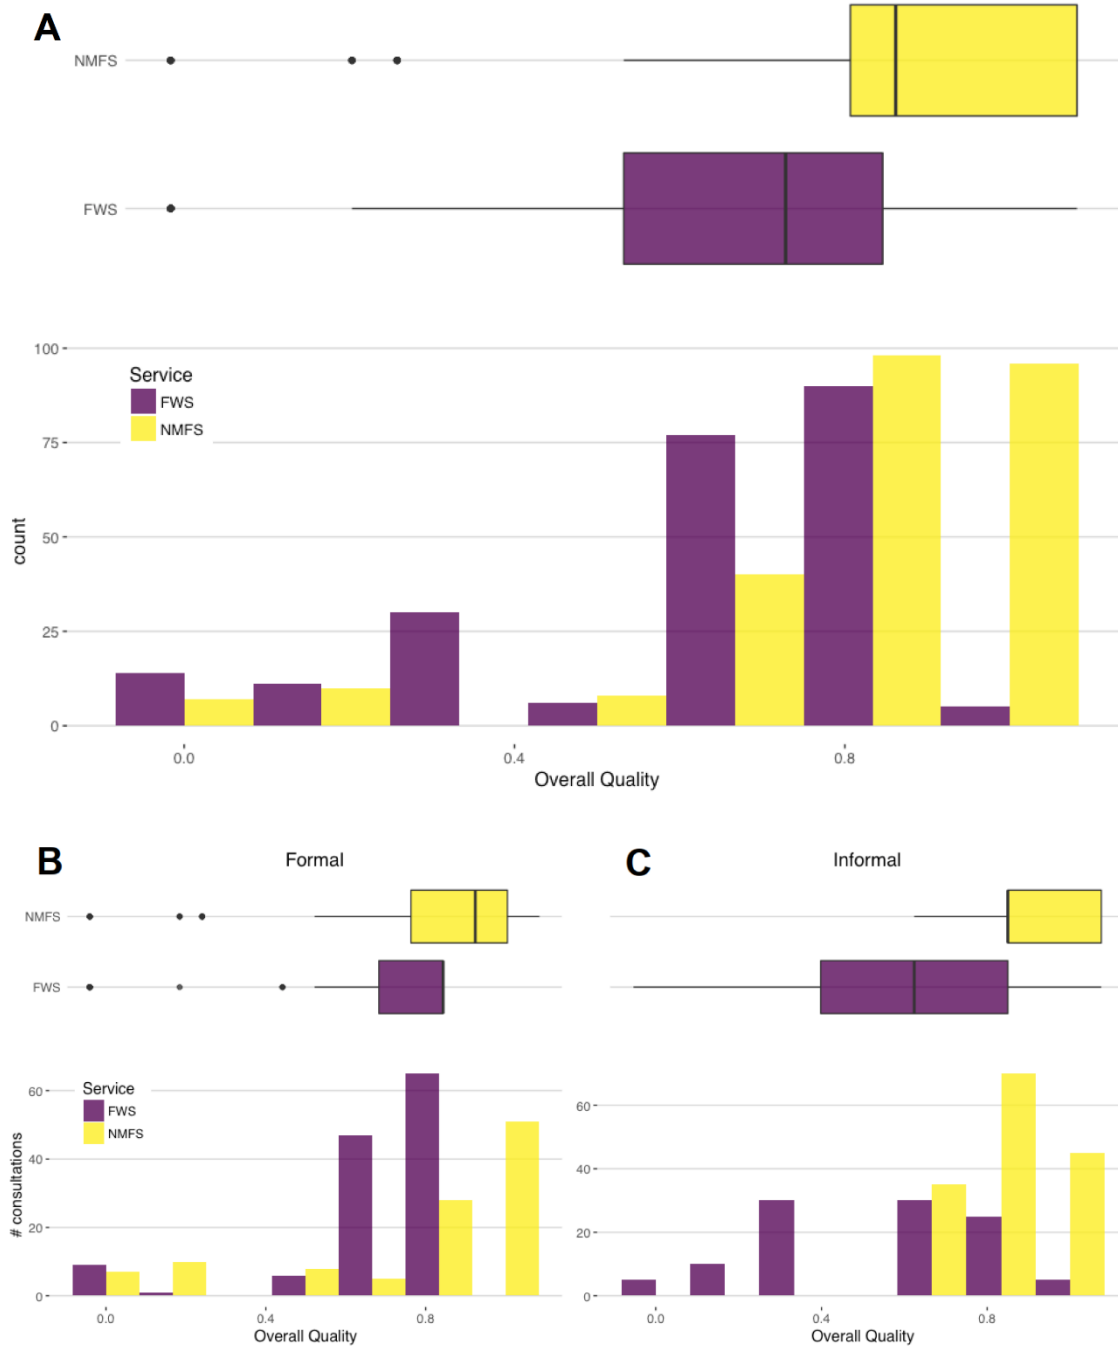

569 **Figure 1. Quality scores for NMFS consultations were higher on average than scores for FWS**  
 570 **consultations across all consultations (A), formal consultations (B), and informal consultations (C).** The  
 571 overall quality score for each consultation is the sum of points scored divided by the sum of points possible  
 572 (see Methods for details). *Top panel:* Histogram and boxplots of all consultations (formal and informal,  
 573 including programmatic consultations) for each Service. *Bottom panel:* Overall scores plotted by Service for  
 574 formal and informal consultations separately.  
 575

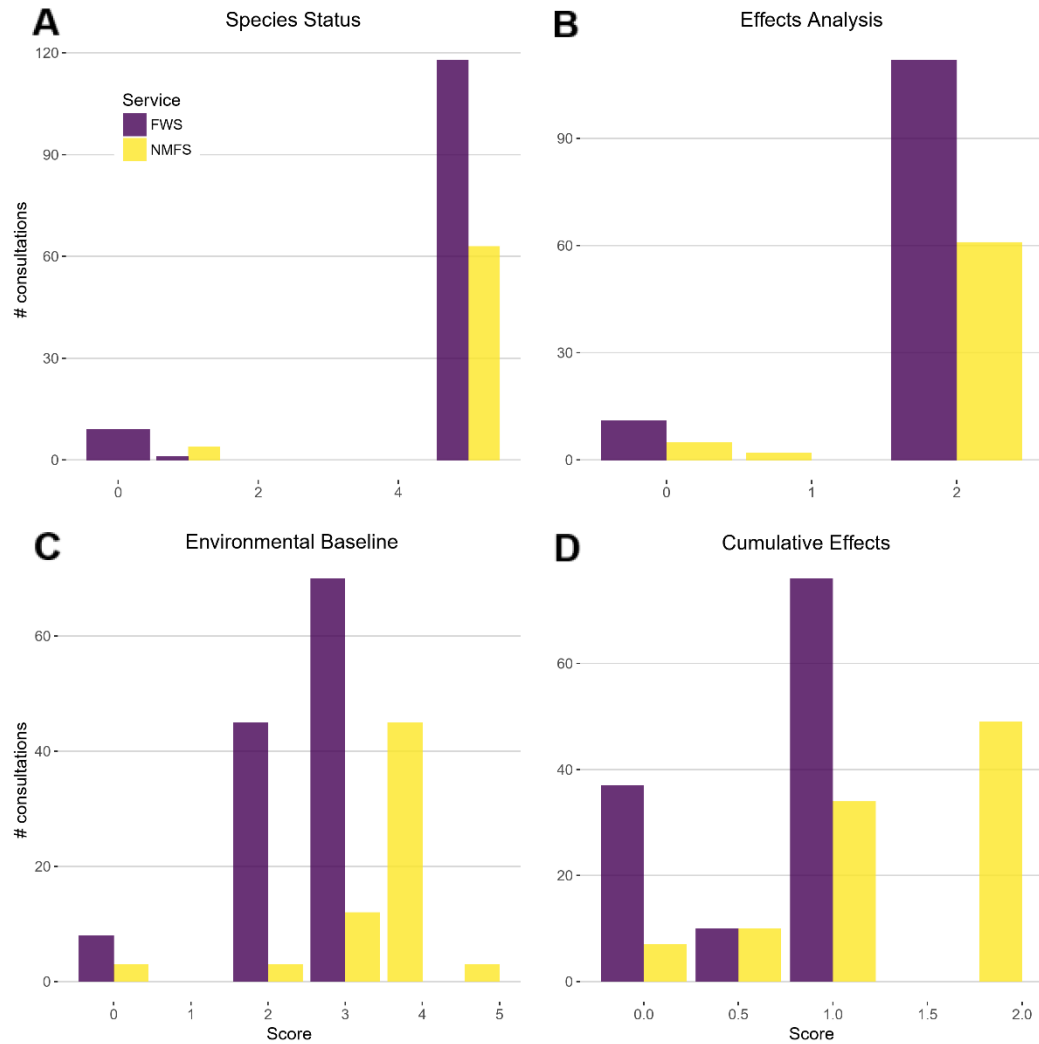

576  
577 **Figure 2. Individual components of consultations produced by NMFS showed higher quality scores**  
578 **than those by FWS on average.** However, the only component that statistically differed between the  
579 Services was the Environmental Baseline ( $z = 5.3993$ ,  $p = 6.691e-08$ ;  $OR_{NMFS} = 2.6e^4$  [95% CI =  $6.5e^2 -$   
580  $1.1e^6$ ]). The scores are the raw quality scores for formal consultation components.

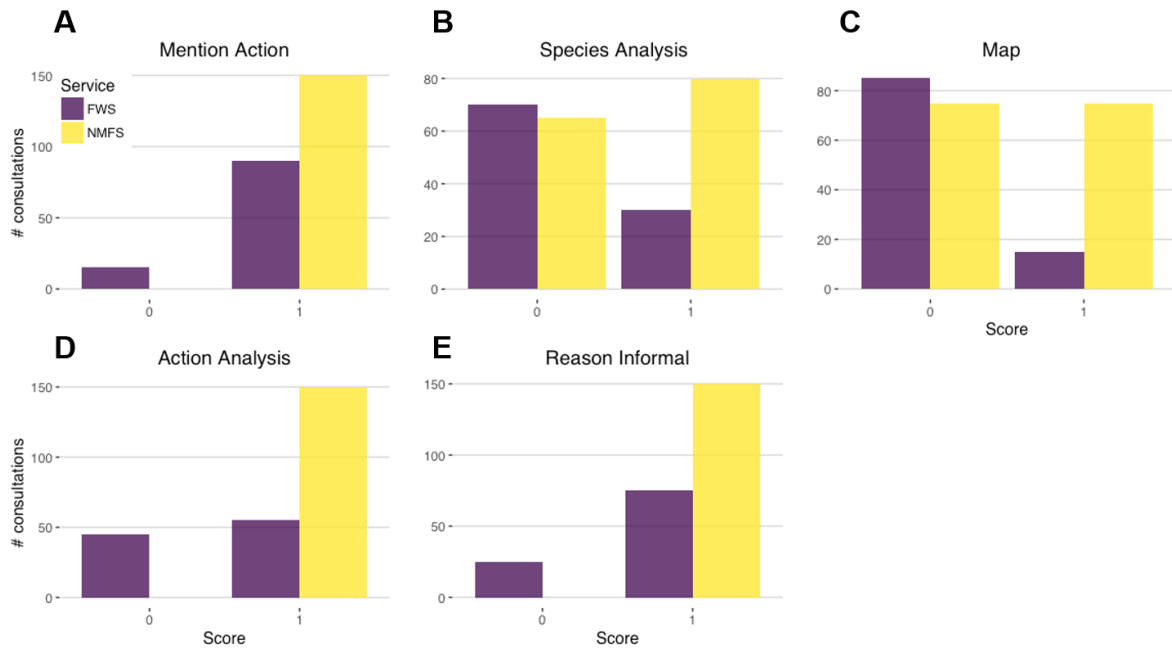

581  
582 **Figure 3. Informal consultations from NMFS featured more information and therefore showed**  
583 **higher quality scores than those from FWS on average.** The components of informal consultation  
584 quality scores were binary (0 indicates absence; 1 indicates presence) in the consultations.

585

### SI FIGURE 1: INFORMAL STICKER CONCURRENCE

586

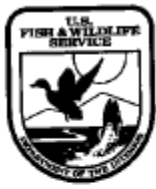

FWS Log No 09-I-0118

The proposed action is not likely to adversely affect resources protected by the Endangered Species Act of 1973, as amended (16 U.S.C. 1531 et seq.) This finding fulfills the requirements of the Act.

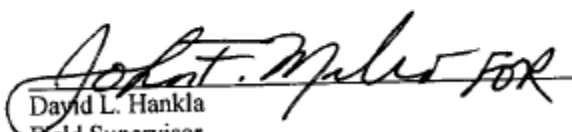  
David L. Hankla  
Field Supervisor

1/15/09  
Date

602

603 Complete informal consultation included in Open Science Framework archive at  
604 <https://dx.doi.org/10.17605/OSF.IO/KAJUQ>. Note that there is no accompanying analysis to clarify why  
605 this informal consultation was found not likely to adversely affect the species or any listed critical habitat.

606 **SI APPENDIX 1: SCORING RUBRIC FOR FORMAL ESA SECTION 7 CONSULTATIONS**

607

608 **Environmental Baseline Quality (Total Points: 5)**

- 609 1. Does the Environmental Baseline address the status of the species in the action area? (1)  
610 2. Is there a mention of past/ongoing threats to the species in the action area? (1)  
611 3. Does the Environmental Baseline take past consultations in the action area into consideration? (1)  
612 4. Is there mention of critical habitat (or lack thereof) for the species? Does said critical habitat overlap  
613 with the action area? (1)  
614 5. Does the baseline include State, tribal, local and private actions already affecting the species that will  
615 occur contemporaneously with the consultation in progress, as per the handbook? (1)

616 **Effects of the Action Quality (Total Points: 2)**

- 617 1. There is a clear and defined cause and effect analysis of the action. (1)  
618 2. The consultation gives an explanation as to if and how said action will negatively affect sea turtles. (1)

619 **Species Status Quality (Total Points: 5)**

- 620 1. Does the consultation adequately describe the species and its habitat/critical habitat? (1)  
621 2. Is the life history of the species addressed? (1)  
622 3. Is there a detailed demographic analysis (if available for the species), including population size,  
623 variability and stability? (1)  
624 4. Is the status and distribution of the species addressed, including reasons for listing? (1)  
625 5. Is there an analysis of the species/critical habitat likely to be affected by the action? (1)

626 **Cumulative Effects Quality (Total Points: 2)**

- 627 1. Does the consultation consider the likelihood of the species to be able to recover? (1)  
628 2. Does the consultation consider the effects of *future* State, tribal, local or private actions that are  
629 reasonably certain to occur, as per the handbook? (1)

630 **SI APPENDIX 2: SCORING RUBRIC FOR INFORMAL ESA SECTION 7 CONSULTATIONS**

631 **Informal Criteria Baseline (Total Points: 5)**

- 632 1. Mentions the action (1)
- 633 2. Some analysis of the action (1)
- 634 3. Some analysis of the impacted species (1)
- 635 4. Reason the consultation stayed informal is mentioned (1)
- 636 5. Map of the area affected by the action (1)



637 **SI APPENDIX 3: INTERVIEW QUESTIONS FOR FISH AND WILDLIFE SERVICE AND**  
638 **NATIONAL MARINE FISHERIES SERVICE BIOLOGISTS**

- 639 1. Can you tell me a bit about how the consultation process usually begins for you?  
640 2. How frequently do you work on consultation? Has this number increased or decreased in recent  
641 years? Why might that be so?  
642 3. How common is it to ask the action agency to provide more information on the action?  
643 4. Have you seen a change over time in the way consultations are completed?  
644 5. The number of consultations for FWS in Florida has been steadily decreasing since 2008  
645 (according to the TAILS database there were 1099 in 2008 vs. 347 in 2014). Do you have an  
646 impression of how often you aren't consulted on things?  
647 6. Is there a consultation key for sea turtles, similar to the FWS Wood Stork Consultation Key? If  
648 not, is this something the Service would consider doing? Would this be an improvement to the  
649 process? Would you be in favor of a more standardized way to approach the consultation  
650 process? (Keys, a standardized ITP, etc.)  
651 7. Can you explain the process of going through the literature and files on hand to satisfy the "best  
652 possible science" condition?  
653 8. How do you exercise precaution when dealing with scientific uncertainty surrounding the effects  
654 of an action on a species/critical habitat? How much benefit of the doubt do you give to the  
655 species? Does it differ depending on the situation? Is this an issue you deal with on a regular  
656 basis?  
657 9. How much time do you spend on the average consultation? FWS TAILS database says the  
658 average days for approval for formal consultations is 89 (13 for informal) days. Does that seem  
659 right?  
660 10. Is previous take ever tallied (formally or informally) to get a sense of how much has been done to  
661 a species over time? In your view, would this be a feasible/helpful thing to implement?  
662 11. How often do you consult the section 7 Handbook?  
663 12. Do you ever get requests for re-initiation of consultations?  
664 13. NMFS is taking the lead on the revision of the handbook this year. What would you like to see in  
665 the revision? In your opinion, is there something that should be clarified?  
666 14. What is your opinion on making all of the final documents publicly available (NMFS has PCTS,  
667 Vero Beach has the formal consultations online but not the informal documents)?  
668 15. Where is there the most room for improvement in the consultation process? Does it work well as  
669 is?

670 **SI APPENDIX 4: INTERVIEW RESPONSES**

671 Included in Open Science Framework archive at <https://dx.doi.org/10.17605/OSF.IO/KAJUQ>

672

673 **SI APPENDIX 5: WOOD STORK CONSULTATION KEY**

674 Included in Open Science Framework archive at <https://dx.doi.org/10.17605/OSF.IO/KAJUQ>

675

676 **SI APPENDIX 6: RECOVERY PLANNING AND IMPLEMENTATION FACT SHEET**

677 Included in Open Science Framework archive at <https://dx.doi.org/10.17605/OSF.IO/KAJUQ>

678

679 **SI APPENDIX 7: SPECIES STATUS ASSESSMENT PRESENTATION**

680 Included in Open Science Framework archive at <https://dx.doi.org/10.17605/OSF.IO/KAJUQ>
